# Supplementary material for: Synthesis and reactivity of nitridorhenium complexes incorporating the mercaptoethylsulfide (SSS) ligand
Source: Royal Society of Chemistry journal article supplement (doi:10.1039/d0dt00631a), 2020-01-01
Supplement: d0dt00631a1.pdf [file d0dt00631a1.pdf]

Supporting Information for:

Synthesis and Reactivity of Nitridorhenium Complexes Incorporating the Mercaptoethylsulfide  
(SSS) Ligand.

Nikola S. Lambic, Roger D. Sommer and Elon A. Ison\*

Department of Chemistry, North Carolina State University, 2620 Yarbrough Drive, Raleigh,  
North Carolina 27695-  
8204, United States

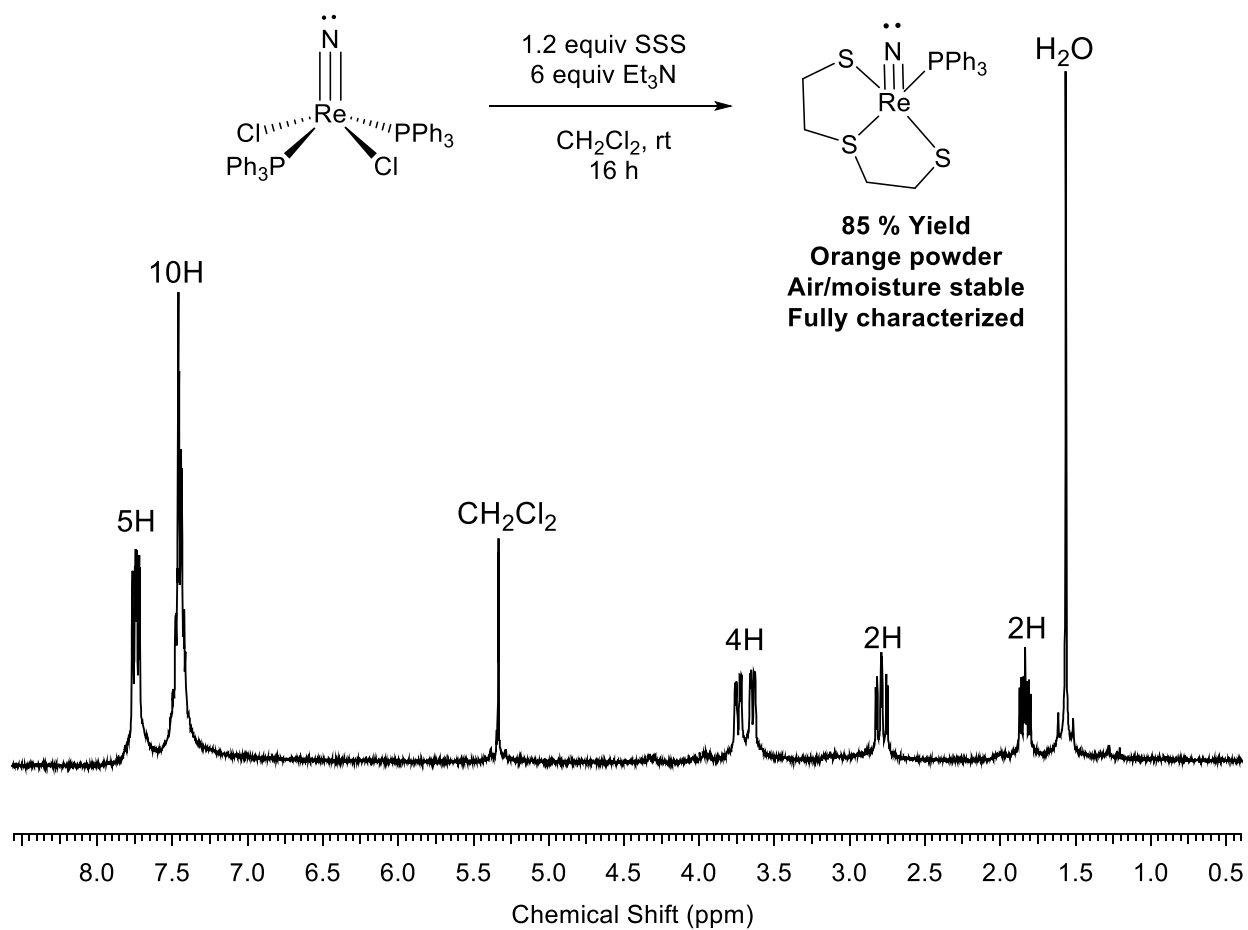

Figure S1. <sup>1</sup>H NMR spectrum for **1** in CD<sub>2</sub>Cl<sub>2</sub>.

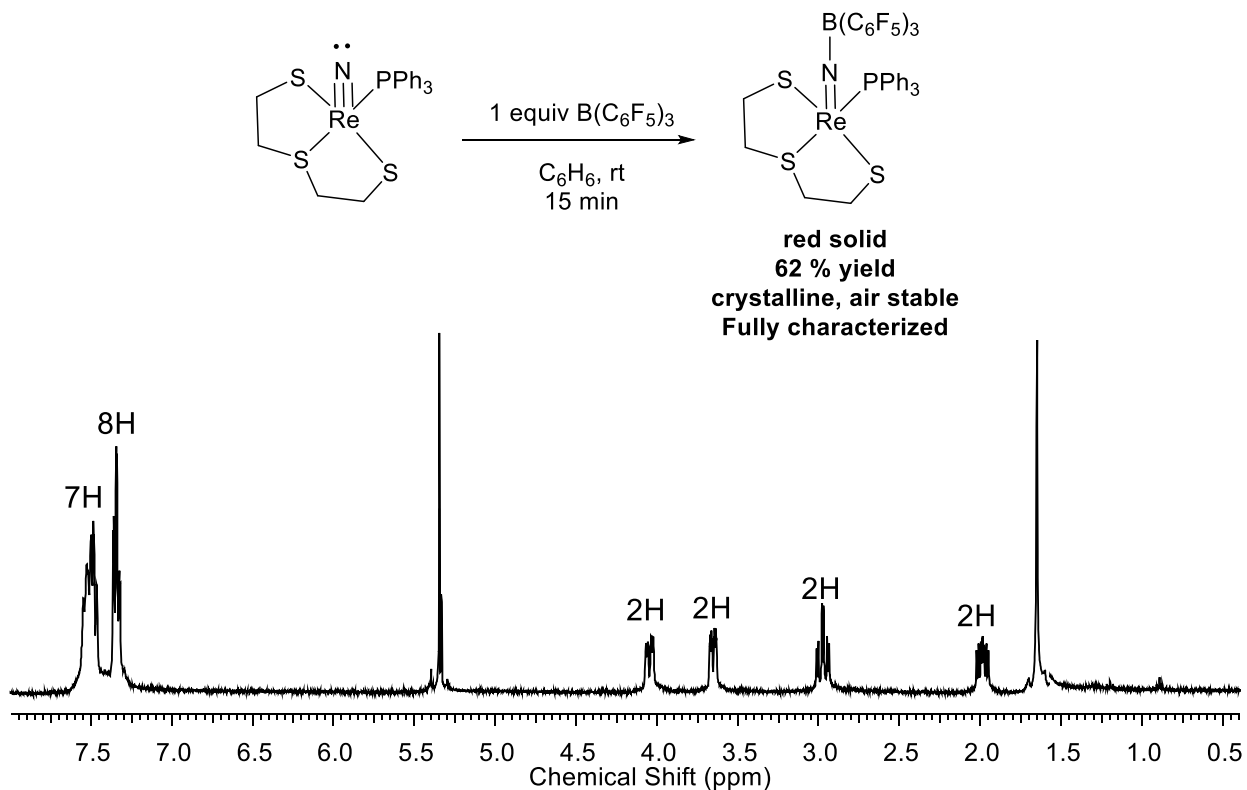

Figure S2.  $^1\text{H}$  NMR spectrum of **2a** in  $\text{CD}_2\text{Cl}_2$ .

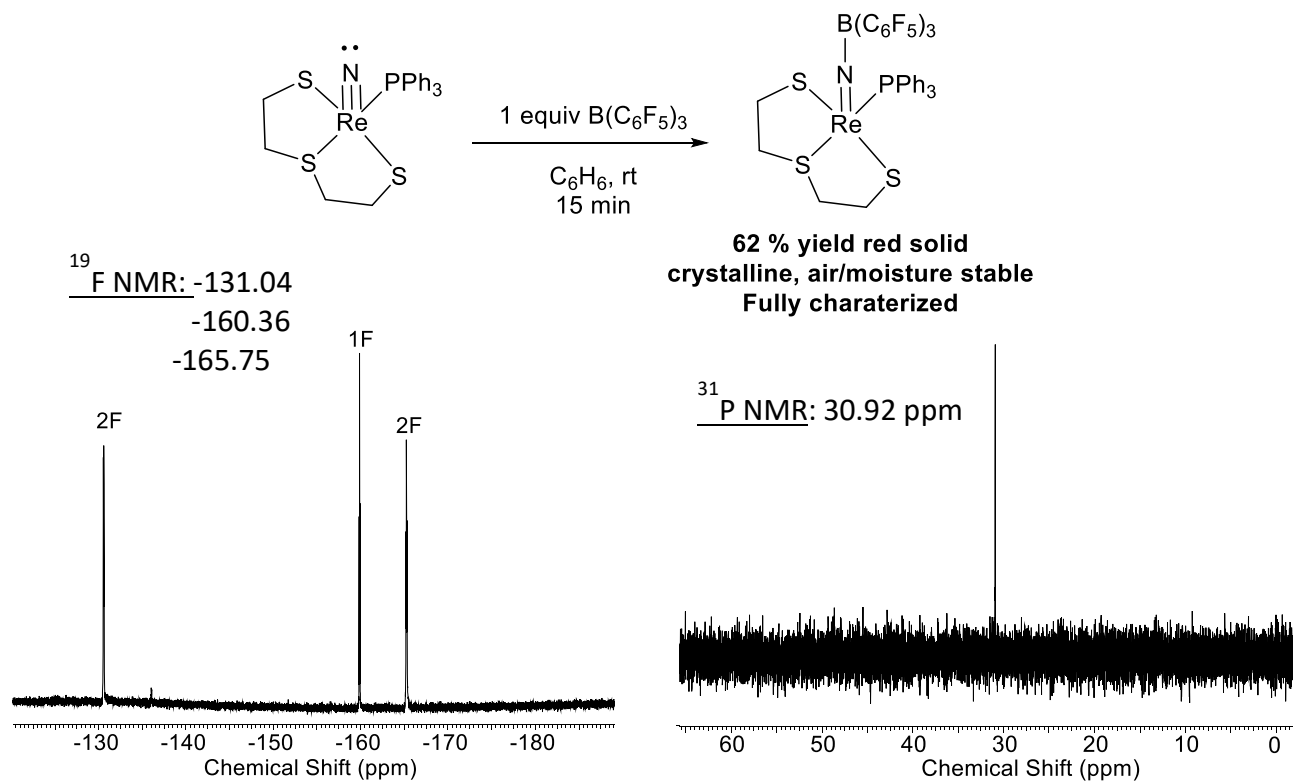

Figure S3.  $^{19}\text{F}$  and  $^{31}\text{P}$  spectra for **2a** in  $\text{C}_6\text{D}_6$ .

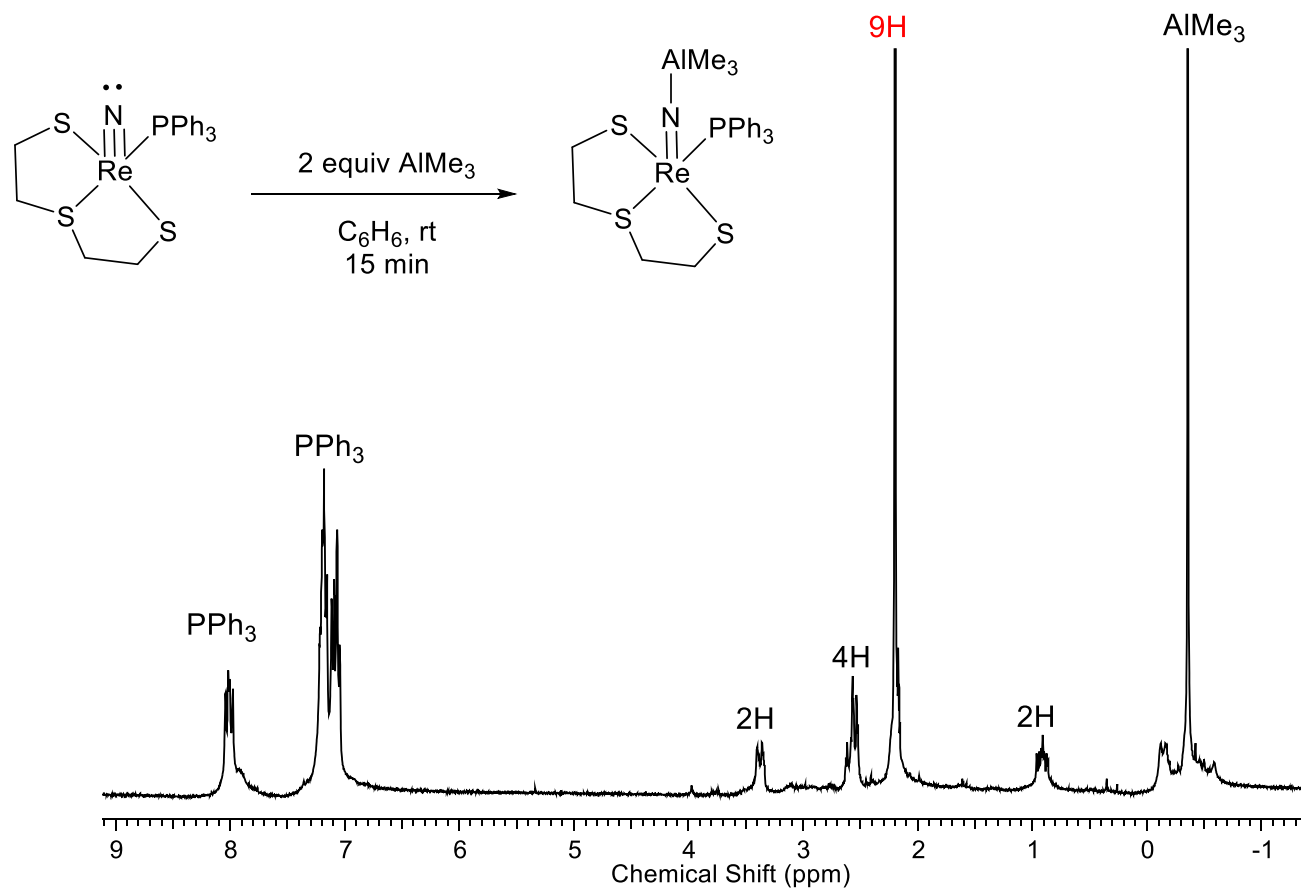

Figure S4. <sup>1</sup>H NMR spectrum for **2b** in C<sub>6</sub>D<sub>6</sub>.

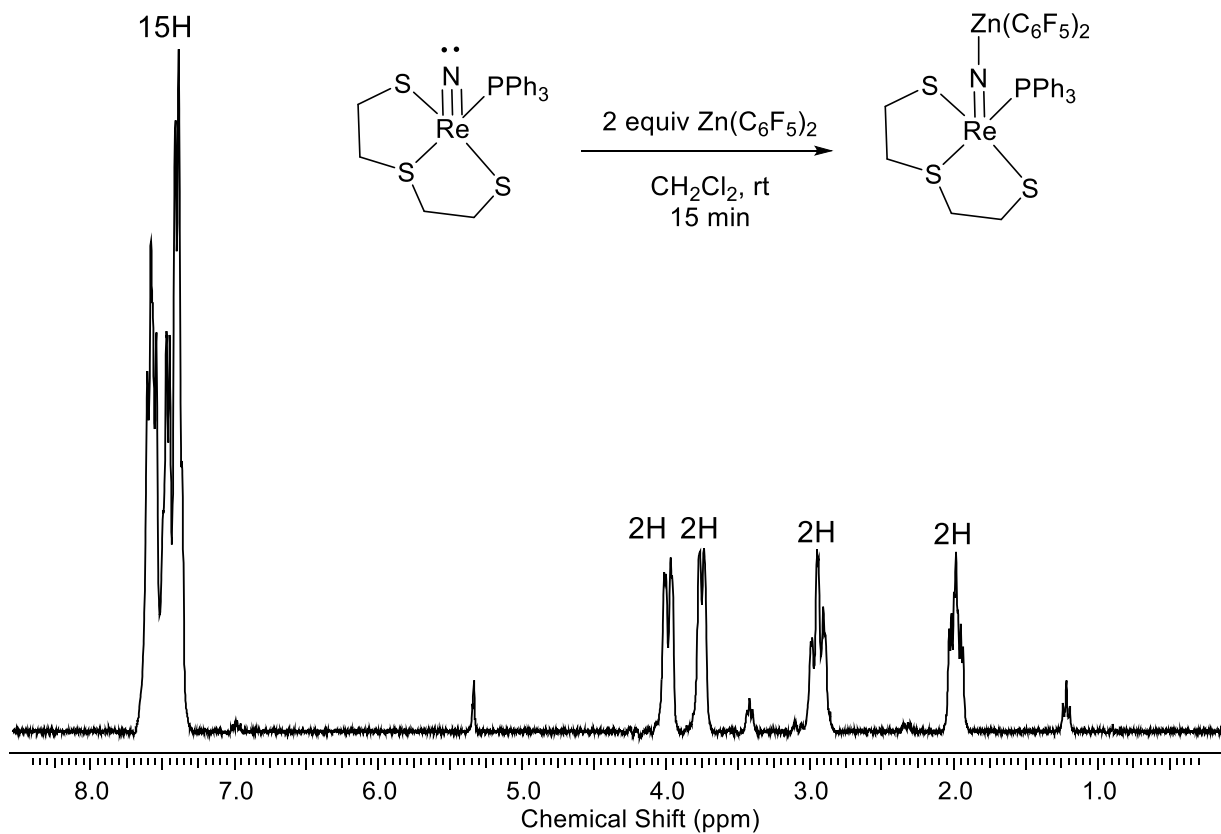

Figure S5.  $^1\text{H}$  NMR spectrum for **2c** in  $\text{C}_6\text{D}_6$ .

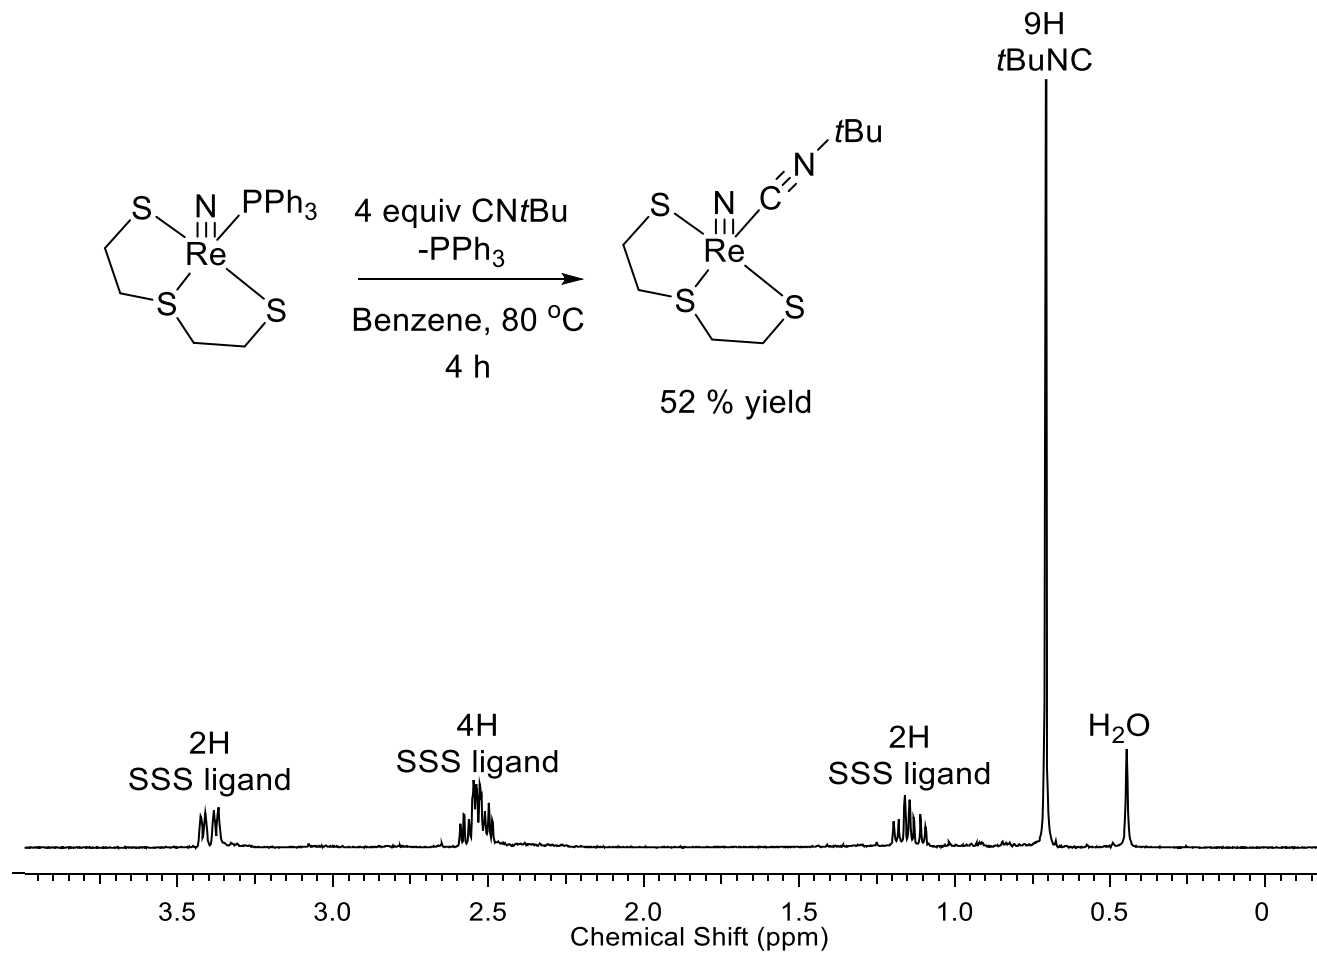

Figure S6.  $^1\text{H}$  NMR spectrum of **4** in  $\text{C}_6\text{D}_6$ .

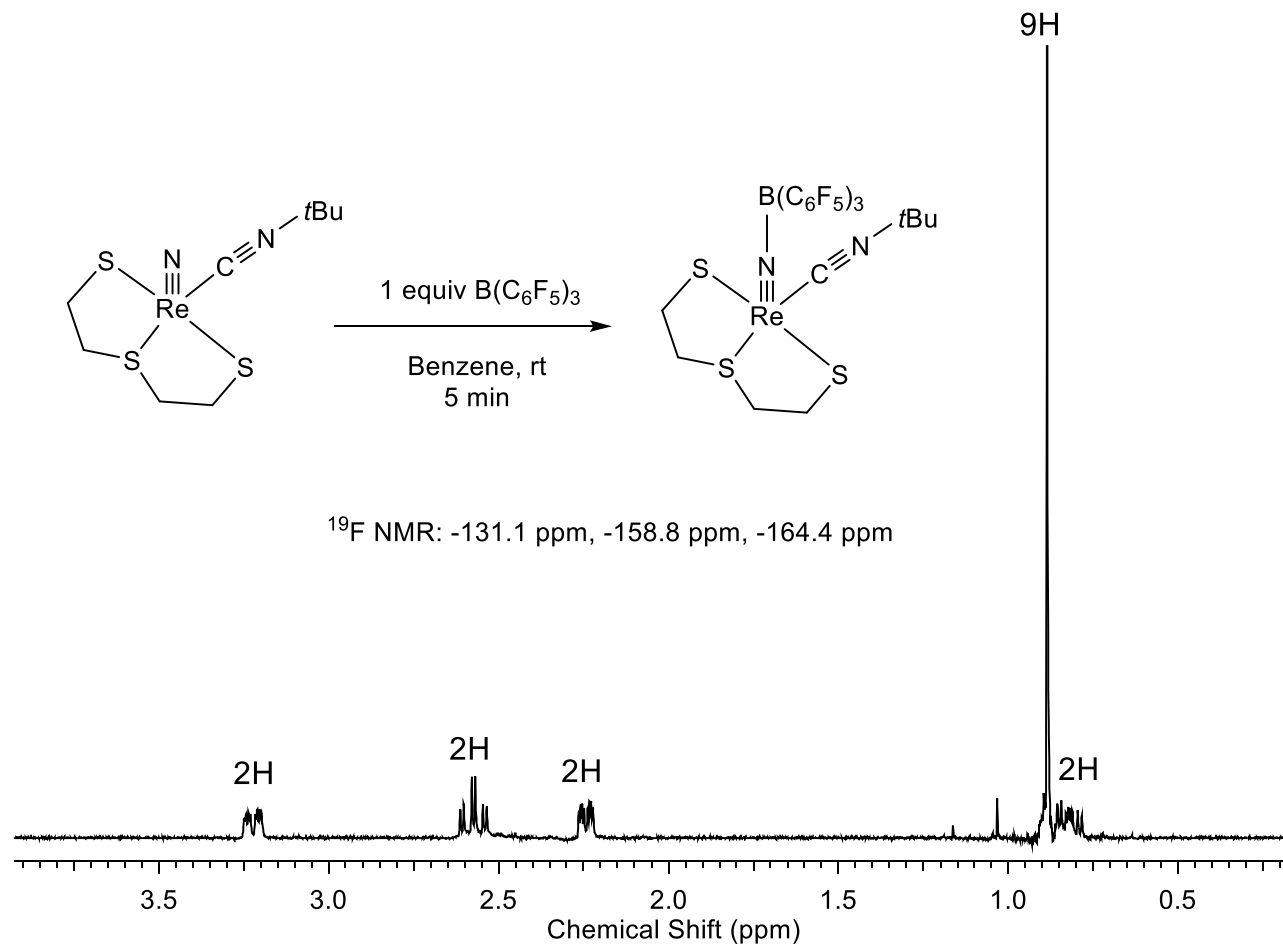

Figure S7. <sup>1</sup>H NMR spectrum of **5a** in C<sub>6</sub>D<sub>6</sub>.

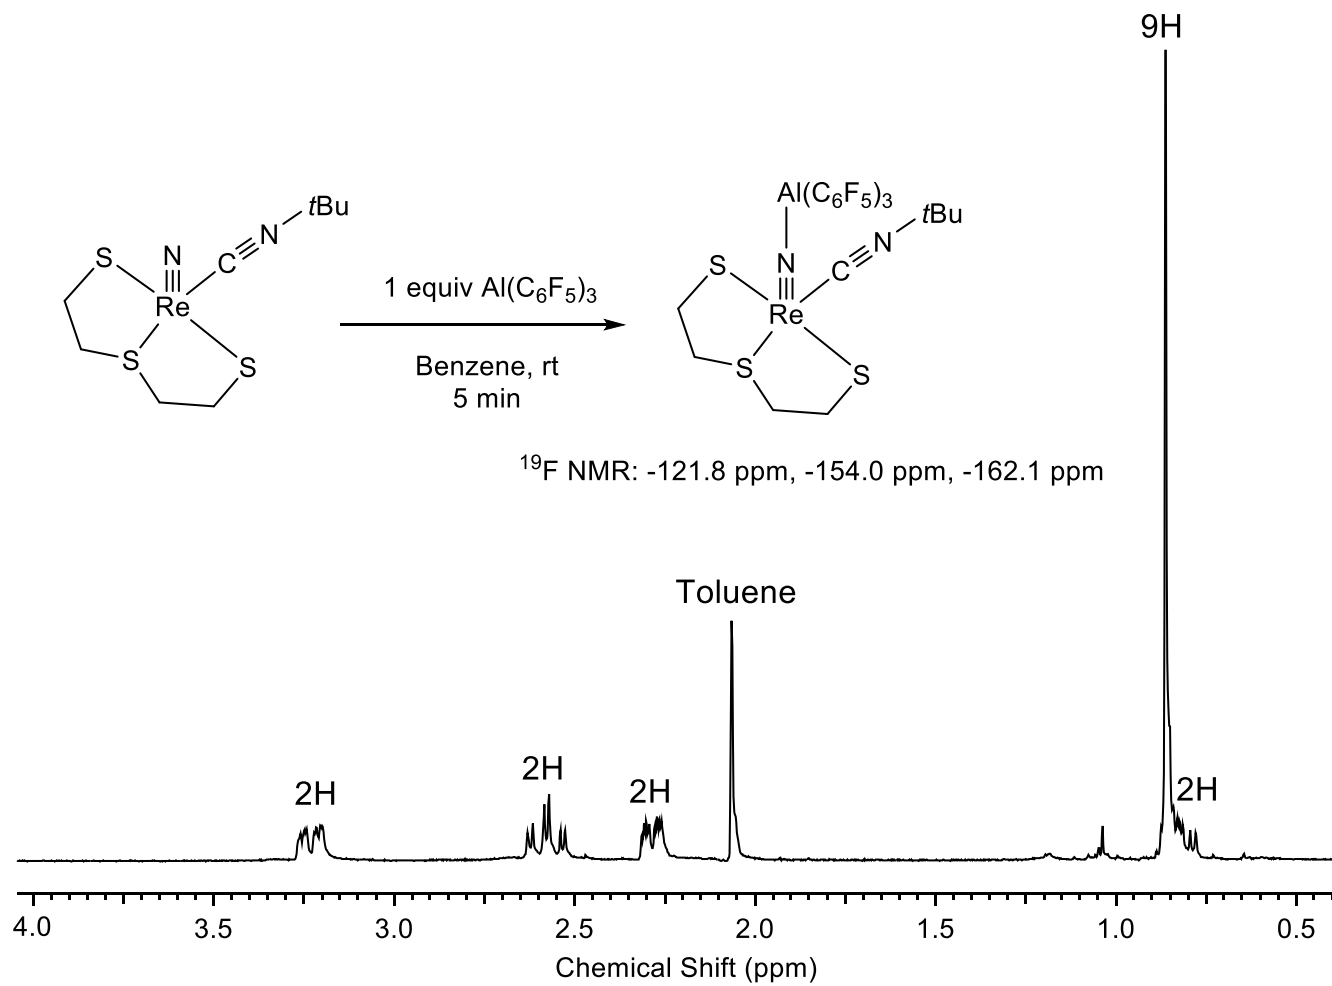

Figure S8.  $^1\text{H}$  NMR spectrum for **5b** in  $\text{C}_6\text{D}_6$ .
